1 Prevalence of overweight and its associated factors among Malaysian adults: findings from a  
2 nationally representative survey

3

4 Chong Chean Tat<sup>1\*</sup>, Lai Wai Kent<sup>1</sup>, Syafinaz Mohd Sallehuddin<sup>1</sup>, Shubash Shander Ganapathy<sup>1</sup>

5

6 <sup>1</sup>Institute for Public Health, National Institutes of Health, Ministry of Health Malaysia.

7

8 \*Corresponding author

9 E-mail: [chean@moh.gov.my](mailto:chean@moh.gov.my)

10

11

12

13

14

15

16

17

NOTE: This preprint reports new research that has not been certified by peer review and should not be used to guide clinical practice.

## Abstract

The World Health Organization has reported that the prevalence of overweight is a growing problem in many countries, including middle- and lower-income countries like Malaysia. This study aimed to determine the prevalence of overweight and its associated factors among Malaysian adults. A total of 9782 Malaysian adults aged 18 and above were included in this study, representing states and federal territories from the National Health and Morbidity Survey 2019. Sociodemographic data (sex, locality, age, marital status, ethnicity, educational level, income level, and health literacy), non-communicable disease status (hypertension, diabetes, and hypercholesterolemia), and lifestyle behaviours (physical activity level, smoking status, and also fruit and vegetable consumption) were collected and analysed to identify factors associated with overweight. The study found that the prevalence of overweight among Malaysian adults was 50.1%. Multivariate analyses showed that several factors, including female gender, ages 30-59 years, being Malay, Indian or other Bumiputeras, being married, and having adequate health literacy, were significantly associated with an increased risk of overweight. Additionally, overweight individuals had a significantly higher risk of non-communicable diseases such as diabetes and hypertension. The study suggests that intervention programs should be implemented in an equitable and cost-effective manner to target these high-risk populations and address the burden of overweight in Malaysia.

## Introduction

Body mass index (BMI) is a commonly utilized tool for evaluating the nutritional status of adults, and it is associated with a range of health risks [1-2]. According to the World Health Organization (WHO), more than 1.9 billion adults worldwide were classified as overweight in 2016, with 650 million of them being considered obese [3]. The global prevalence of obesity has nearly tripled since 1975, affecting many countries, including those with low and moderate incomes [3]. In Malaysia, a nationwide survey conducted in 2019 revealed a rising trend in obesity prevalence, increasing from 15.1% in 2011, to 17.7% in 2015, and finally to 19.9% in 2019 [4-6].

The increasing prevalence of overweight and obesity has been linked to the development of non-communicable diseases (NCDs), including stroke, cardiovascular disease, and diabetes [2]. This trend has resulted in a significant global health burden [7], contributing to higher rates of disability-adjusted life years (DALYs) and mortality [8]. Recent studies have also suggested that overweight and obesity may compromise the immune system, thereby increasing the risk of infectious diseases [9]. As such, addressing overweight and obesity and promoting healthy weight management strategies is crucial to reduce the health burden associated with NCDs and infectious diseases [10].

Despite the implementation of various recommendations and intervention programs aimed at preventing overweight and obesity, research has shown that achieving and maintaining weight reduction can be challenging [11]. Therefore, the aim of this study was to determine the prevalence of overweight among Malaysian adults and its associated factors. The findings of this study will provide crucial information for prioritizing and developing

precise planning guidelines to effectively combat the rising prevalence of overweight in Malaysia.

## Methods

### Study design and sampling

This study involved the secondary analysis of data collected from the National Health and Morbidity Survey (NHMS) 2019, which is a cross-sectional population-based survey conducted in Malaysia. The survey was conducted nationwide between July 14th and October 2nd, 2019, with an achievement response rate of 87.2% [6]. The study population included all adults aged 18 years and above who had lived in non-institutional living quarters (LQs) for at least two weeks in all states and federal territories of Malaysia. Individuals living in institutional living quarters, such as hotels, hostels, hospitals, and others, were not included in this study.

A two-stage stratified random sampling technique was used in this study to achieve national representativeness. The main stratum included all states and federal territories, while the secondary stratum consisted of both urban and rural strata from the main stratum. The main sampling unit involved 475 Enumeration Blocks (EBs), comprising 362 EBs from urban areas and 113 EBs from rural areas. The secondary sampling unit involved a total of 5,676 living quarters (LQs), comprising 4,320 LQs from urban areas and 1,356 LQs from rural areas within the selected EBs. The classification of urban and rural areas was defined by

Department of Statistics Malaysia. The full details of the research methods and sampling design used in this nationwide survey are available in the official report [6].

## Questionnaire

The data collection process for this nationwide survey included face-to-face interviews and self-administered process using structured questionnaires programmed into application in tablet. For respondents who preferred paper-based questionnaires, they were also provided. Information on sociodemographic factors, non-communicable disease (NCD) status, and lifestyle behaviours were collected from respondents aged 18 and above and extracted from the survey database for analysis in this study.

## Dependent variable

This study employed a standard protocol to measure body height and weight twice for each participant, with the final measurements calculated from the average of the two readings. Body height was determined using the SECA Stadiometer 213 (SECA GmbH & Co. KG, Germany) to the nearest 0.1 cm, while body weight was measured using the Tanita Personal Scale HD 319 (Tanita Corporation, Japan) to the nearest 0.1 kg. Prior to measurement, the devices were calibrated and participants were instructed to wear lightweight clothing, remove their shoes, and stand upright on the measuring equipment. Body mass index (BMI) was computed by dividing body weight in kilograms by the square of body height in meters ( $\text{kg/m}^2$ ), where BMI values of 25.0 - 29.9  $\text{kg/m}^2$  and  $\geq 30 \text{ kg/m}^2$  were used to define overweight and obesity, respectively [12]. For the present analysis, only adults

with a BMI  $\geq 25.0$  kg/m<sup>2</sup> (inclusive of obesity) were included to examine the independent determinants of overweight.

## Independent variables

The study obtained sociodemographic data including sex, locality, age, marital status, ethnicity, educational level, income level, and health literacy, as well as NCD status (hypertension, diabetes, and hypercholesterolemia) and lifestyle behaviours (physical activity level, smoking status, and fruit and vegetable consumption) from the respondents. These data were analysed to determine the factors associated with overweight.

This study collected various sociodemographic data from the respondents. Age was categorized into three groups: 18 to 29 years, 30 to 59 years, and 60 years and above. Ethnicity was classified into five categories: Malays, Chinese, Indians, other Bumiputeras (Sabah and Sarawak), and others. Respondents' income was grouped into four categories: < RM 1000, RM 1000 - 1999, RM 2000 - 2999, and  $\geq$  RM 3000. Working status was classified into two categories: working and not working. Educational level was categorized as no formal education, primary education (completion of Standard Six), secondary school (completion of Form Five), and tertiary education (completion of Form Six, obtained certificate, diploma or any other academic degree). Marital status was divided into three groups: single, married, and other (divorced, and widow or widower). The respondents' health literacy was assessed using the HLS-M-Q18, an adapted version of HLS-EU-Q47[13], where a score of 0 to 33 was classified as limited health literacy, and a score above 33 was classified as adequate health literacy.

The NCD status of the respondents was evaluated by determining the presence of diabetes, hypertension, and hypercholesterolemia through either self-reported diagnosis by healthcare professionals or clinical measurement using appropriate devices. The CardioChek portable blood test device was used to obtain finger-prick blood glucose (BG) and total cholesterol (TC) levels, with fasting capillary BG  $\geq 7.0$  mmol/L and/or non-fasting capillary BG  $\geq 11.1$  mmol/L indicating diabetes [14], and TC levels  $\geq 5.2$  mmol/L indicating hypercholesterolemia [15]. Blood pressure (BP) was measured using the HEM-907 BP Monitor (Kyoto, Japan), with systolic BP  $\geq 140$  mm Hg and/or diastolic BP  $\geq 90$  mm Hg indicating hypertension.

This study utilized validated questionnaires to determine smoking status and level of physical activity. The Global Adult Tobacco Surveillance (GATS) [17] questionnaire was used to identify current smoking status, while the short version of the International Physical Activity Questionnaire (IPAQ) [18] was used to assess the level of physical activity. The respondents' fruit and vegetable consumption were also collected and was considered adequate if they consumed a minimum of five servings daily, and inadequate if they consumed less than five servings daily. Criteria for active physical activity level were defined as a minimum of 20 minutes per day of three vigorous activities, or a minimum of 30 minutes per day of five days of moderate-intensity activity or walking, or a minimum of 600 MET-minutes per week of a combination of walking, moderate-intensity, or vigorous-intensity activities for at least five days, or a minimum of 1500 MET-minutes per week of three days of vigorous-intensity activity, or a minimum of 3000 MET-minutes per week of a combination of walking, moderate-intensity, or vigorous-intensity activities for at least seven days.

## Statistical analysis

Statistical analysis was performed using IBM SPSS Statistics (version 28, Chicago, Illinois, USA). Descriptive statistics were used to summarize the data, and the Pearson's  $\chi^2$  test was used to evaluate differences between BMI categories and independent variables. A multiple logistic regression model was employed to identify the factors associated with overweight, while controlling for potential confounders. All variables with a P-value less than .25 were included in the final model, with an adjusted odds ratio (AOR) obtained for each variable. A P-value less than .25 was considered sufficient for controlling residual confounding [19]. Both crude odds ratio (COR) and AOR were presented with 95% confidence intervals (CI), and P-values less than .05 were considered statistically significant.

## Ethical approval

This study obtained ethical approval from the Medical Research and Ethics Committee (MREC), Ministry of Health Malaysia. It was registered under the National Medical Research Registry (NMRR) with number NMRR-18-3085-44207. All participants provided written informed consent prior to interviews during the NHMS's 2019 data collection.

## Results

The study involved a total of 9782 respondents, predominantly comprising Malays (51.3%), followed by Chinese (20.7%), other Bumiputeras (11.3%), other ethnic groups (10.9%), and Indians (5.9%). The male respondents (52.4%) slightly outnumbered the females



(47.6%), with the majority of the participants being married (63.9%) and aged between 30 and 59 years (54.1%). Nearly half of the respondents had completed secondary education (49.6%) and had an income level of RM3000 or more (53.4%). The majority of respondents resided in urban areas (77.9%) and were employed, with adequate health literacy. Among the respondents, 18.3% had diabetes, 30.1% had hypertension, and 39.0% had hypercholesterolemia. Regarding lifestyle behaviours, most of the respondents were physically active (77.1%), non-smokers (76.8%), and did not consume the recommended daily servings of fruits and vegetables (94.7%).

**Table 1: Prevalence of overweight among adults Malaysian**

| Variable              | Prevalence            |                   | P value*        |
|-----------------------|-----------------------|-------------------|-----------------|
|                       | Non-overweight, n (%) | Overweight, n (%) |                 |
| Overall               | 4389 (49.9)           | 5393 (50.1)       |                 |
| Sociodemographic Data |                       |                   |                 |
| Sex                   |                       |                   | <b>&lt;.001</b> |
| - Male                | 2223 (54.1)           | 2308 (45.9)       |                 |
| - Female              | 2166 (45.3)           | 3085 (54.7)       |                 |
| Age                   |                       |                   | <b>&lt;.001</b> |
| - 18 – 29             | 1253 (62.7)           | 854 (37.3)        |                 |
| - 30 – 59             | 2084 (42.1)           | 3416 (57.9)       |                 |
| - ≥ 60                | 1052 (50.8)           | 1123 (49.2)       |                 |
| Locality              |                       |                   | 0.704           |
| - Rural               | 1704 (50.5)           | 2105 (49.5)       |                 |
| - Urban               | 2685 (49.7)           | 3288 (50.3)       |                 |
| Ethnicity             |                       |                   | <b>&lt;.001</b> |
| - Malays              | 2728 (46.4)           | 3577 (53.6)       |                 |
| - Chinese             | 665 (59.7)            | 540 (40.3)        |                 |
| - Indians             | 228 (36.3)            | 395 (63.7)        |                 |
| - Other Bumiputeras   | 460 (44.8)            | 594 (55.2)        |                 |
| - Others              | 308 (60.4)            | 287 (39.6)        |                 |
| Educational Level     |                       |                   | 0.184           |
| - No Formal Education | 285 (56.8)            | 271 (43.2)        |                 |
| - Primary Education   | 974 (51.1)            | 1211 (48.9)       |                 |

|                          |             |             |                 |
|--------------------------|-------------|-------------|-----------------|
| - Secondary Education    | 2073 (48.7) | 2642 (51.3) |                 |
| - Tertiary Education     | 1046 (49.9) | 1260 (50.1) |                 |
| Marital Status           |             |             | <b>&lt;.001</b> |
| - Single                 | 1209 (61.2) | 881 (38.8)  |                 |
| - Married                | 2733 (44.9) | 3948 (55.1) |                 |
| - Others                 | 447 (47.9)  | 564 (52.1)  |                 |
| Working Status           |             |             | 0.095           |
| - Working                | 2615 (50.9) | 3147 (49.1) |                 |
| - Not Working            | 1774 (48.1) | 2246 (51.9) |                 |
| Income Level             |             |             | 0.451           |
| - Less than RM 1000      | 480 (53.6)  | 477 (46.4)  |                 |
| - RM 1000 – RM 1999      | 902 (51.7)  | 1068 (48.3) |                 |
| - RM 2000 – RM 2999      | 706 (49.9)  | 930 (50.1)  |                 |
| - RM 3000 & above        | 2062 (49.2) | 2597 (50.8) |                 |
| Health Literacy          |             |             | <b>0.001</b>    |
| - Limited                | 1511 (54.1) | 1638 (45.9) |                 |
| - Adequate               | 2491 (47.7) | 3300 (52.3) |                 |
| NCD Status               |             |             |                 |
| Diabetes                 |             |             | <b>&lt;.001</b> |
| - No                     | 3586 (53.1) | 3762 (46.9) |                 |
| - Yes                    | 803 (35.8)  | 1628 (64.2) |                 |
| Hypertension             |             |             | <b>&lt;.001</b> |
| - No                     | 3159 (57.0) | 2847 (43.0) |                 |
| - Yes                    | 1229 (33.5) | 2543 (66.5) |                 |
| Hypercholesterolemia     |             |             | <b>&lt;.001</b> |
| - No                     | 2616 (55.2) | 2608 (44.8) |                 |
| - Yes                    | 1773 (41.5) | 2785 (58.5) |                 |
| Lifestyle Behaviour      |             |             |                 |
| Smoking Status           |             |             | <b>&lt;.001</b> |
| - No                     | 3329 (48.1) | 4472 (51.9) |                 |
| - Yes                    | 1043 (55.8) | 905 (44.2)  |                 |
| Physical Activity        |             |             | <b>.043</b>     |
| - Inactive               | 1070 (52.7) | 1214 (47.3) |                 |
| - Active                 | 3274 (49.2) | 4127 (50.8) |                 |
| Fruit & Vegetable Intake |             |             | .225            |
| - Inadequate             | 3573 (49.0) | 4506 (51.0) |                 |
| - Adequate               | 153 (54.7)  | 202 (45.3)  |                 |

\*P values of less than .05 were considered significant.

In the present study, the prevalence of overweight among adults in Malaysia was reported to be 50.1%. The prevalence of overweight was significantly higher among females (compared to males;  $p < 0.001$ ); aged 30 to 59 years old (compared to other age group;  $p < 0.001$ ); being Indians (compared to other ethnicities;  $p < 0.001$ ); married (compared to other marital status;  $p < 0.001$ ); adequate health literacy level (compared to limited health literacy level;  $p < 0.001$ ); diagnosed with diabetes (compared to non-diabetes;  $p < 0.001$ ); hypertension (compared to non-hypertensive group;  $p < 0.001$ ); high cholesterol level (compared to normal cholesterol level;  $p < 0.001$ ); non-smoker (compared to smoker;  $p < 0.001$ ); and those who were physically active (compared to physically inactive;  $p = 0.043$ ). Details for the prevalence of overweight and variables were shown in Table 1.

**Table 2: Factors associated with overweight among adults Malaysians**

| Variable                     | COR [95% CI]     | P value <sup>a</sup> | AOR [95% CI]*    | P value <sup>b</sup> |
|------------------------------|------------------|----------------------|------------------|----------------------|
| <b>Sociodemographic Data</b> |                  |                      |                  |                      |
| Sex                          |                  |                      |                  |                      |
| - Male                       | Ref              |                      | Ref              |                      |
| - Female                     | 1.42 (1.26,1.61) | <.001                | 1.33 (1.11,1.58) | <b>.002</b>          |
| Age                          |                  |                      |                  |                      |
| - 18 – 29                    | Ref              |                      | Ref              |                      |
| - 30 – 59                    | 2.31 (1.98,2.70) | <.001                | 1.61 (1.31,1.97) | <b>&lt;.001</b>      |
| - ≥ 60                       | 1.63 (1.34,1.98) | <.001                | 0.75 (0.54,1.04) | .088                 |
| Ethnicity                    |                  |                      |                  |                      |
| - Malays                     | 1.71 (1.39,2.11) | <.001                | 1.68 (1.36,2.07) | <b>&lt;.001</b>      |
| - Indians                    | 2.60 (1.84,3.67) | <.001                | 2.59 (1.80,3.74) | <b>&lt;.001</b>      |
| - Other Bumiputras           | 1.83 (1.40,2.38) | <.001                | 1.82 (1.38,2.39) | <b>&lt;.001</b>      |
| - Others                     | 0.97 (0.69,1.35) | .852                 | 1.15 (0.81,1.62) | .434                 |
| - Chinese                    | Ref              |                      | Ref              |                      |
| Marital Status               |                  |                      |                  |                      |
| - Single                     | Ref              |                      | Ref              |                      |
| - Married                    | 1.93 (1.67,2.23) | <.001                | 1.23 (1.00,1.50) | <b>.046</b>          |
| - Others                     | 1.72 (1.38,2.13) | <.001                | 0.92 (0.67,1.25) | .581                 |
| Health Literacy              |                  |                      |                  |                      |

|                      |                  |       |                  |                 |
|----------------------|------------------|-------|------------------|-----------------|
| - Limited            | Ref              |       | Ref              |                 |
| - Adequate           | 1.29 (1.11,1.51) | .001  | 1.19 (1.01,1.39) | <b>.033</b>     |
| NCD Status           |                  |       |                  |                 |
| Diabetes             |                  |       |                  |                 |
| - No                 | Ref              |       | Ref              |                 |
| - Yes                | 2.03 (1.73,2.73) | <.001 | 1.47 (1.23,1.75) | <b>&lt;.001</b> |
| Hypertension         |                  |       |                  |                 |
| - No                 | Ref              |       | Ref              |                 |
| - Yes                | 2.63 (2.30,3.01) | <.001 | 2.60 (2.20,3.07) | <b>&lt;.001</b> |
| Hypercholesterolemia |                  |       |                  |                 |
| - No                 | Ref              |       | Ref              |                 |
| - Yes                | 1.74 (1.52,2.00) | <.001 | 1.16 (0.99,1.35) | .062            |
| Lifestyle Behaviour  |                  |       |                  |                 |
| Smoking Status       |                  |       |                  |                 |
| - No                 | Ref              |       | Ref              |                 |
| - Yes                | 0.74 (0.63,0.87) | <.001 | 0.85 (0.70,1.05) | .125            |
| Physical Activity    |                  |       |                  |                 |
| - Inactive           | 0.87 (0.76,0.99) | .043  | 0.89 (0.77,1.03) | .120            |
| - Active             | Ref              |       | Ref              |                 |

Abbreviations: CI, Confidence Interval; COR, Crude Odds Ratio; AOR, Adjusted Odds Ratio.

<sup>a</sup>P value of less than .25 were included in the final model.

<sup>b</sup>P values of less than .05 were considered significant.

\*Multiple logistic regression was applied. The final model was adjusted for sex, age, ethnicity, marital status, health literacy, diabetes, hypertension, hypercholesterolemia, smoking status, and physical activity.

Multiple logistic regression analysis was conducted to identify the independent factors associated with overweight among Malaysian adults. The findings, presented in Table 2, reveal that being females (AOR: 1.33, 95%CI: 1.11, 1.58) increases the likelihood of overweight. Similarly, adults aged 30 to 59 years old (AOR: 1.61; 95%CI: 1.31, 1.97) are at higher risk of being overweight compared to those aged 18 to 29 years old. Ethnicity also plays

a role, with Malays (AOR: 1.68, 95%CI: 1.36, 2.07), Indians (AOR: 2.59, 95%CI: 1.80, 3.74), and other Bumiputeras (AOR: 1.82, 95%CI: 1.38, 2.39) having a significantly higher risk of overweight than Chinese. Married individuals (AOR: 1.23; 95%CI: 1.00, 1.50) were also found to be more likely to be overweight compared to single individuals. Surprisingly, adults with adequate health literacy (AOR: 1.19; 95%CI: 1.01, 1.39) were also at a higher risk of overweight compared to those with limited health literacy. The study also revealed that respondents with hypertension (AOR: 2.60; 95%CI: 2.20, 3.07) and diabetes (AOR: 1.47; 95%CI: 1.23, 1.75) had a higher likelihood of being overweight than respondents without these conditions. However, no significant association was found between cholesterol level and overweight. Finally, there was no significant association reported between lifestyle behaviours, such as physical activity and smoking status, and overweight among adults in Malaysia.

## Discussion

This study aimed to identify the prevalence and factors associated with overweight among adults in Malaysia from a national representative study. The results showed that 50.1% of Malaysian adults had overweight, which is an increase from previous national surveys conducted in 2011 [4] and 2015 [5], where the rates were 44.5% and 47.7%, respectively. This suggests that there has been a notable increase in the prevalence of overweight among Malaysian adults. Furthermore, the prevalence of overweight in Malaysia was higher than that observed in southern China [20], and most Southeast Asian countries [21-27], except for Brunei [28], but lower than the rates reported in the United States [29]. This finding is concerning, as it indicates that a significant proportion of Malaysian adults are overweight.

Multivariable logistic regression analysis was conducted to examine the independent determinants associated with overweight risk, after adjusting for potential confounding variables. Females had a significantly higher risk of overweight compared to males, which is consistent with the global trend [30-31]. The adverse impacts of female obesity on reproductive health have been well-established [32-33]. Additionally, adults aged 30-39, 40-49, and 50-59 years old were significantly more likely to be overweight compared to those aged 18-29 years old, while there was no significant association for those aged 60 years old and above. This finding is consistent with previous studies conducted in other countries [24,26,34]. The increased financial independence, easy access to food, and availability of calorie-dense food in lower- and middle-income countries may contribute to the higher prevalence of overweight among adults [35].

The present study conducted a comparison of the ethnicity of adults, revealing a higher risk of overweight among Malays, Indians, and other Bumiputeras in contrast to Chinese. This finding was consistent with previous national population surveys [36] and a study conducted in Singapore [37]. The observed differences in dietary patterns across ethnic groups might explain this trend [38]. Additionally, the study found that married individuals were more likely to be overweight and obese compared to single people, a finding consistent with other studies [21,23,26,39]. The hypothesis is that having an obese spouse increases the likelihood of becoming obese due to comparable lifestyle behaviors [40]. Interestingly, the study found that individuals with adequate health literacy were associated with a higher risk of overweight compared to those with limited health literacy. This finding is different from other studies [41-42], although one study did not find an association between health literacy and overweight [43]. Despite this finding, health literacy remains crucial in weight management [41-42].

Also, the present study found that the higher risk of overweight was significantly associated with an increased likelihood of NCD, such as diabetes and hypertension. This finding is consistent with a pooled analysis of 1.8 million people from 97 prospective cohorts and approximately half of the risk of cardiovascular disease and three-quarters of the risk of stroke related to BMI were due to NCD [44]. Therefore, proper planning and effective strategies are crucial to intervene and address the burden of disease related to overweight [44-47].

This study had several strengths, including the use of a large nationally representative population, which allowed for valid inferences to be made regarding Malaysian adults. Additionally, the use of validated and standardized instruments during data collection decreased the likelihood of measurement inaccuracies. However, there were some limitations to this study, including its cross-sectional design, which prevented causal relationships to be established between exposure risk and disease outcomes. Furthermore, the inadequate dietary data collected in this study may have made it difficult to substantiate the association between food consumption and overweight among the population. Longitudinal studies are needed to further investigate the causal relationship between risk factors and overweight, as well as to evaluate the effectiveness of interventions to reduce the burden of overweight in Malaysia.

## Conclusion

The present study findings indicate that a high prevalence of overweight exists among adults in Malaysia, affecting approximately half of the population. The likelihood of being

overweight and obese was associated with various factors, such as female gender, aged 30 to 59 years, being of Malay, Indian or other Bumiputera ethnicity, being married, and having adequate health literacy. Additionally, adults diagnosed with NCD (hypertension and diabetes) were more likely to be overweight. To effectively address the burden of overweight, public health nutrition interventions in Malaysia should focus on these high-risk populations using a cost-effective and equitable approach.

## Acknowledgement

The authors would like to thank the Director General of Health Malaysia for his permission to publish this paper. We would also like to thank all research team members and data collectors for their contributions and commitment in this study. We appreciate the funding and support from the Ministry of Health Malaysia. We are also grateful for the kind cooperation of all participants.

## References

1. Ng M, Fleming T, Robinson M, Thomson B, Graetz N, Margono C, et al. Global, regional, and national prevalence of overweight and obesity in children and adults during 1980-2013: a systematic analysis for the Global Burden of Disease Study 2013. *Lancet*. 2014 Aug 30;384(9945):766-81. doi: 10.1016/S0140-6736(14)60460-8. Epub 2014 May 29. Erratum in: *Lancet*. 2014 Aug 30;384(9945):746. PMID: 24880830; PMCID: PMC4624264.



2. The Lancet Gastroenterology Hepatology. Obesity: another ongoing pandemic. Lancet Gastroenterol Hepatol. 2021 Jun;6(6):411. doi: 10.1016/S2468-1253(21)00143-6. PMID: 34015350; PMCID: PMC9259282.
3. Institute for Public Health. National Health and Morbidity Survey 2011 (NHMS 2011). Vol II: Non-Communicable Diseases. Kuala Lumpur: Ministry of Health Malaysia; 2011.
4. Institute for Public Health. National Health and Morbidity Survey 2015 (NHMS 2015). Vol II: Non-Communicable Diseases, Risk Factors & Other Health Problems. Kuala Lumpur: Ministry of Health Malaysia; 2015.
5. Institute for Public Health. National Health and Morbidity Survey (NHMS) 2019: Vol I: NCDs – Non-Communicable Diseases: Risk Factors and other Health Problems. Ministry of Health Malaysia; 2020.
6. Lin X, Xu Y, Xu J, Pan X, Song X, Shan L, et al. Global burden of noncommunicable disease attributable to high body mass index in 195 countries and territories, 1990-2017. Endocrine. 2020 Aug;69(2):310-320. doi: 10.1007/s12020-020-02352-y. Epub 2020 Jun 2. PMID: 32488838.
7. GBD 2015 Obesity Collaborators. Health Effects of Overweight and Obesity in 195 Countries over 25 Years. N Engl J Med. 2017 Jul 6;377(1):13-27. doi: 10.1056/NEJMoa1614362. Epub 2017 Jun 12. PMID: 28604169; PMCID: PMC5477817.
8. Dai H, Alsallhe TA, Chalghaf N, Riccò M, Bragazzi NL, Wu J. The global burden of disease attributable to high body mass index in 195 countries and territories, 1990-2017: An analysis of the Global Burden of Disease Study. PLoS Med. 2020 Jul 28;17(7):e1003198. doi: 10.1371/journal.pmed.1003198. PMID: 32722671; PMCID: PMC7386577.

9. Francisco V, Pino J, Campos-Cabaleiro V, Ruiz-Fernández C, Mera A, Gonzalez-Gay MA, et al. Obesity, Fat Mass and Immune System: Role for Leptin. *Front Physiol.* 2018 Jun 1;9:640. doi: 10.3389/fphys.2018.00640. PMID: 29910742; PMCID: PMC5992476.
10. The Lancet Gastroenterology Hepatology. Obesity: another ongoing pandemic. *Lancet Gastroenterol Hepatol.* 2021 Jun;6(6):411. doi: 10.1016/S2468-1253(21)00143-6. PMID: 34015350; PMCID: PMC9259282.
11. Lim KG. A Review of Adult Obesity Research in Malaysia. *Med J Malaysia.* 2016 Jun;71(Suppl 1):1-19. PMID: 27801384.
12. WHO Expert Consultation. Appropriate body-mass index for Asian populations and its implications for policy and intervention strategies. *Lancet.* 2004 Jan 10;363(9403):157-63. doi: 10.1016/S0140-6736(03)15268-3. Erratum in: *Lancet.* 2004 Mar 13;363(9412):902. PMID: 14726171.
13. Mohamad EMW, Kaundan MK, Hamzah MR, Azlan AA, Ayub SH, Tham JS, et al. Establishing the HLS-M-Q18 short version of the European health literacy survey questionnaire for the Malaysian context. *BMC Public Health.* 2020 Apr 28;20(1):580. doi: 10.1186/s12889-020-08704-7. PMID: 32345285; PMCID: PMC7189540.
14. Petersmann A, Müller-Wieland D, Müller UA, Landgraf R, Nauck M, Freckmann G, et al. Definition, Classification and Diagnosis of Diabetes Mellitus. *Exp Clin Endocrinol Diabetes.* 2019 Dec;127(S 01):S1-S7. doi: 10.1055/a-1018-9078. Epub 2019 Dec 20. PMID: 31860923.
15. National Cholesterol Education Program (NCEP) Expert Panel on Detection, Evaluation, and Treatment of High Blood Cholesterol in Adults (Adult Treatment Panel III). Third Report of the National Cholesterol Education Program (NCEP) Expert Panel on Detection, Evaluation, and Treatment of High Blood Cholesterol in Adults (Adult

- Treatment Panel III) final report. *Circulation*. 2002 Dec 17;106(25):3143-421. PMID: 12485966.
16. Working Group on Hypertension CPG. *Clinical Practice Guidelines—Management of Hypertension*. 5th ed. Putrajaya: Ministry of Health, Malaysia; 2018.
17. Global Adult Tobacco Survey Collaborative Group. *Global Adults Tobacco Survey*. Published 2020. Accessed December 15, 2022. Available from: [https://cdn.who.int/media/docs/default-source/ncds/ncd-surveillance/gats/18\\_gats\\_analysispackage\\_final\\_23nov2020.pdf?sfvrsn=67e2065f\\_3](https://cdn.who.int/media/docs/default-source/ncds/ncd-surveillance/gats/18_gats_analysispackage_final_23nov2020.pdf?sfvrsn=67e2065f_3).
18. International Physical Activity Questionnaire. Published 2005. Accessed December 15, 2022. Available from: <http://www.ipaq.ki.se>.
19. Bursac Z, Gauss CH, Williams DK, Hosmer DW. Purposeful selection of variables in logistic regression. *Source Code Biol Med*. 2008 Dec 16;3:17. doi: 10.1186/1751-0473-3-17. PMID: 19087314; PMCID: PMC2633005.
20. Hu L, Huang X, You C, Li J, Hong K, Li P, Wu Y, et al. Prevalence of overweight, obesity, abdominal obesity and obesity-related risk factors in southern China. *PLoS One*. 2017 Sep 14;12(9):e0183934. doi: 10.1371/journal.pone.0183934. PMID: 28910301; PMCID: PMC5598943.
21. de Juras AR, Hsu WC, Hu SC. Prevalence and Determinants of the Co-Occurrence of Overweight or Obesity and Micronutrient Deficiencies among Adults in the Philippines: Results from a National Representative Survey. *Nutrients*. 2021 Jul 8;13(7):2339. doi: 10.3390/nu13072339. PMID: 34371849; PMCID: PMC8308505.
22. Nazeha N, Sathish T, Soljak M, Dunleavy G, Visvalingam N, Divakar U, Bajpai RC, Soh CK, Christopoulos G, Car J. A Comparative Study of International and Asian Criteria for

Overweight or Obesity at Workplaces in Singapore. Asia Pac J Public Health. 2021 May;33(4):404-410. doi: 10.1177/1010539521998855. Epub 2021 Mar 14. PMID: 33715451.

23. Papageorgiou AT, Deruelle P, Gunier RB, Rauch S, García-May PK, Mhatre M, et al. Preeclampsia and COVID-19: results from the INTERCOVID prospective longitudinal study. Am J Obstet Gynecol. 2021 Sep;225(3):289.e1-289.e17. doi: 10.1016/j.ajog.2021.05.014. Epub 2021 Jun 26. PMID: 34187688; PMCID: PMC8233533.

24. Pengpid S, Vonglokharn M, Kounnavong S, Sychareun V, Peltzer K. The prevalence of underweight and overweight/obesity and its correlates among adults in Laos: a cross-sectional national population-based survey, 2013. Eat Weight Disord. 2020 Apr;25(2):265-273. doi: 10.1007/s40519-018-0571-5. Epub 2018 Sep 17. PMID: 30225825.

25. Sakboonyarat B, Pornpongsawad C, Sangkool T, Phanmanas C, Kesonphaet N, Tangthongtawi N, et al. Trends, prevalence and associated factors of obesity among adults in a rural community in Thailand: serial cross-sectional surveys, 2012 and 2018. BMC Public Health. 2020 Jun 3;20(1):850. doi: 10.1186/s12889-020-09004-w. PMID: 32493314; PMCID: PMC7271557.

26. Chakraborty PA, Talukder A, Haider SS, Gupta RD. Prevalence and factors associated with underweight, overweight and obesity among 15-49-year-old men and women in Timor-Leste. PLoS One. 2022 Feb 10;17(2):e0262999. doi: 10.1371/journal.pone.0262999. PMID: 35143506; PMCID: PMC8830684.

27. Nguyen SM, Tran HTT, Tran BQ, Van Hoang M, Truong BD, Nguyen LT, et al. Compliance to dietary guidelines on fruit and vegetable intake and prevalence of

- hypertension among Vietnamese adults, 2015. Eur J Prev Cardiol. 2020 Jan;27(1):39-46. doi: 10.1177/2047487319867500. Epub 2019 Aug 5. PMID: 31382808; PMCID: PMC6920565.
28. Ong SK, Lai DTC, Wong JYY, Si-Ramlee KA, Razak LA, Kassim N, et al. Cross-sectional STEPwise Approach to Surveillance (STEPS) Population Survey of Noncommunicable Diseases (NCDs) and Risk Factors in Brunei Darussalam 2016. Asia Pac J Public Health. 2017 Nov;29(8):635-648. doi: 10.1177/1010539517738072. Epub 2017 Oct 30. PMID: 29082745.
29. Wang Y, Beydoun MA, Min J, Xue H, Kaminsky LA, Cheskin LJ. Has the prevalence of overweight, obesity and central obesity levelled off in the United States? Trends, patterns, disparities, and future projections for the obesity epidemic. Int J Epidemiol. 2020 Jun 1;49(3):810-823. doi: 10.1093/ije/dyz273. PMID: 32016289; PMCID: PMC7394965.
30. Ameye H, Swinnen J. Obesity, income and gender: the changing global relationship. Global Food Security. 2019 Dec 1;23:267-81.
31. Garawi F, Devries K, Thorogood N, Uauy R. Global differences between women and men in the prevalence of obesity: is there an association with gender inequality? Eur J Clin Nutr. 2014 Oct;68(10):1101-6. doi: 10.1038/ejcn.2014.86. Epub 2014 Jun 11. PMID: 24918120.
32. Silvestris E, de Pergola G, Rosania R, Loverro G. Obesity as disruptor of the female fertility. Reprod Biol Endocrinol. 2018 Mar 9;16(1):22. doi: 10.1186/s12958-018-0336-z. PMID: 29523133; PMCID: PMC5845358.

33. Glenn T, Harris AL, Lindheim SR. Impact of obesity on male and female reproductive outcomes. *Curr Opin Obstet Gynecol.* 2019 Aug;31(4):201-206. doi: 10.1097/GCO.0000000000000549. PMID: 31022079.
34. Chowdhury MAB, Adnan MM, Hassan MZ. Trends, prevalence and risk factors of overweight and obesity among women of reproductive age in Bangladesh: a pooled analysis of five national cross-sectional surveys. *BMJ Open.* 2018 Jul 19;8(7):e018468. doi: 10.1136/bmjopen-2017-018468. PMID: 30030307; PMCID: PMC6059314.
35. Poobalan A, Aucott L. Obesity Among Young Adults in Developing Countries: A Systematic Overview. *Curr Obes Rep.* 2016 Mar;5(1):2-13. doi: 10.1007/s13679-016-0187-x. PMID: 26883372; PMCID: PMC4796326.
36. Lim KG. A Review of Adult Obesity Research in Malaysia. *Med J Malaysia.* 2016 Jun;71(Suppl 1):1-19. PMID: 27801384.
37. Park SH, Nicolaou M, Dickens BSL, Yang Q, Tan KW, van Dam RM. Ethnicity, Neighborhood and Individual Socioeconomic Status, and Obesity: The Singapore Multiethnic Cohort. *Obesity (Silver Spring).* 2020 Dec;28(12):2405-2413. doi: 10.1002/oby.22995. Epub 2020 Oct 16. PMID: 33064936.
38. Shyam S, Khor GL, Ambak R, Mahadir B, Hasnan M, Ambu S, et al. Association between dietary patterns and overweight risk among Malaysian adults: evidence from nationally representative surveys. *Public Health Nutr.* 2020 Feb;23(2):319-328. doi: 10.1017/S1368980019001861. Epub 2019 Aug 9. PMID: 31397262.
39. Liu J, Garstka MA, Chai Z, Chen Y, Lipkova V, Cooper ME, Mokoena KK, et al. Marriage contributes to higher obesity risk in China: findings from the China Health and Nutrition Survey. *Ann Transl Med.* 2021 Apr;9(7):564. doi: 10.21037/atm-20-4550. PMID: 33987262; PMCID: PMC8105842.

40. Cobb LK, McAdams-DeMarco MA, Gudzone KA, Anderson CA, Demerath E, Woodward M, et al. Changes in Body Mass Index and Obesity Risk in Married Couples Over 25 Years: The ARIC Cohort Study. *Am J Epidemiol.* 2016 Mar 1;183(5):435-43. doi: 10.1093/aje/kwv112. Epub 2015 Sep 23. PMID: 26405117; PMCID: PMC4772434.
41. Michou M, Panagiotakos DB, Costarelli V. Low health literacy and excess body weight: a systematic review. *Cent Eur J Public Health.* 2018 Sep;26(3):234-241. doi: 10.21101/cejph.a5172. PMID: 30419628.
42. Cheng YL, Shu JH, Hsu HC, Liang Y, Chou RH, Hsu PF, et al. High health literacy is associated with less obesity and lower Framingham risk score: Sub-study of the VGH-HEALTHCARE trial. *PLoS One.* 2018 Mar 28;13(3):e0194813. doi: 10.1371/journal.pone.0194813. PMID: 29590183; PMCID: PMC5874050.
43. Lovrić B, Placento H, Farčić N, Lipič Baligač M, Mikšić Š, Mamić M, et al. Association between Health Literacy and Prevalence of Obesity, Arterial Hypertension, and Diabetes Mellitus. *Int J Environ Res Public Health.* 2022 Jul 24;19(15):9002. doi: 10.3390/ijerph19159002. PMID: 35897372; PMCID: PMC9331373.
44. Global Burden of Metabolic Risk Factors for Chronic Diseases Collaboration (BMI Mediated Effects). Metabolic mediators of the effects of body-mass index, overweight, and obesity on coronary heart disease and stroke: a pooled analysis of 97 prospective cohorts with 1·8 million participants. *Lancet.* 2014 Mar 15;383(9921):970-83. doi: 10.1016/S0140-6736(13)61836-X. Epub 2013 Nov 22. PMID: 24269108; PMCID: PMC3959199.
45. GBD 2015 Obesity Collaborators. Health Effects of Overweight and Obesity in 195 Countries over 25 Years. *N Engl J Med.* 2017 Jul 6;377(1):13-27. doi: 10.1056/NEJMoa1614362. Epub 2017 Jun 12. PMID: 28604169; PMCID: PMC5477817.

460 46. Wang Y, Zhao L, Gao L, Pan A, Xue H. Health policy and public health implications of  
 461 obesity in China. *Lancet Diabetes Endocrinol.* 2021 Jul;9(7):446-461. doi:  
 462 10.1016/S2213-8587(21)00118-2. Epub 2021 Jun 4. PMID: 34097869.

463 47. Tiwari A, Balasundaram P. Public Health Considerations Regarding Obesity. 2022 Sep  
 464 3. In: StatPearls [Internet]. Treasure Island (FL): StatPearls Publishing; 2022 Jan—. PMID:  
 465 34283488.
